# Supplementary material
Source: Frontiers journal article supplement (https://www.frontiersin.org/articles/494998)
Supplement: Table_1.DOCX [file Table_1.DOCX]

Injury mechanisms and severity in pediatric traumatic brain injury patients admitted to the ward or intensive care unit: A Collaborative European Neurotrauma Effectiveness Research in Traumatic Brain Injury (CENTER-TBI) study

Lennart Riemann1, Klaus Zweckberger1, Andreas Unterberg1, Ahmed El Damaty1, Alexander Younsi1*, and the ﻿Collaborative European NeuroTrauma Effectiveness Research in Traumatic Brain Injury (CENTER-TBI) Investigators and Participants2

1 Department of Neurosurgery, Heidelberg University Hospital, Heidelberg, Germany

2 CENTER-TBI Investigators and Participants listed at the end of the article

# The ﻿Collaborative European NeuroTrauma Effectiveness Research in Traumatic Brain Injury (CENTER-TBI) Investigators and Participants

Cecilia Åkerlund1, Krisztina Amrein2, Nada Andelic3, Lasse Andreassen4, Audny Anke5, Anna Antoni6, Gérard Audibert7, Philippe Azouvi8, Maria Luisa Azzolini9, Ronald Bartels10, Pál Barzó11, Romuald Beauvais12, Ronny Beer13, Bo-Michael Bellander14, Antonio Belli15, Habib Benali16, Maurizio Berardino17, Luigi Beretta9, Morten Blaabjerg18, Peter Bragge19, Alexandra Brazinova20, Vibeke Brinck21, Joanne Brooker22, Camilla Brorsson23, Andras Buki24, Monika Bullinger25, Manuel Cabeleira26, Alessio Caccioppola27, Emiliana Calappi 27, Maria Rosa Calvi9, Peter Cameron28, Guillermo Carbayo Lozano29, Marco Carbonara27, Giorgio Chevallard30, Arturo Chieregato30, Giuseppe Citerio31, 32, Maryse Cnossen33, Mark Coburn34, Jonathan Coles35, Jamie D. Cooper36, Marta Correia37, Amra Čović 38, Nicola Curry39, Endre Czeiter24, Marek Czosnyka26, Claire Dahyot‑Fizelier40, Helen Dawes41, Véronique DeKeyser42, Vincent Degos16, Francesco Della Corte43, Hugo den Boogert10, Bart Depreitere44, Đula Đilvesi 45, Abhishek Dixit46, Emma Donoghue22, Jens Dreier47, Guy‑Loup  Dulière48, Ari Ercole46, Patrick Esser41, Erzsébet Ezer49, Martin  Fabricius50, Valery L. Feigin51, Kelly  Foks52, Shirin Frisvold53, Alex Furmanov54, Pablo Gagliardo55, Damien Galanaud16, Dashiell Gantner28, Guoyi Gao56, Pradeep George57, Alexandre Ghuysen58, Lelde Giga59, Ben Glocker60, Jagoš Golubovic45, PedroA. Gomez 61, Johannes Gratz62, Benjamin Gravesteijn33, Francesca Grossi43, RussellL. Gruen63, Deepak Gupta64, JuanitaA. Haagsma33, Iain Haitsma65, Raimund Helbok13, Eirik Helseth66, Lindsay Horton 67, Jilske Huijben33, PeterJ. Hutchinson68, Bram Jacobs69, Stefan Jankowski70, Mike Jarrett21, Ji‑yao  Jiang56, Kelly Jones51, Mladen Karan47, AngelosG. Kolias68, Erwin Kompanje71, Daniel Kondziella50, Evgenios Koraropoulos46, Lars‑Owe Koskinen72, Noémi Kovács73, Ana Kowark34, Alfonso Lagares61, Linda Lanyon57, Steven Laureys74, Fiona Lecky75, Rolf Lefering76, Valerie Legrand77, Aurelie Lejeune78, Leon Levi79, Roger Lightfoot80, Hester Lingsma33, AndrewI.R. Maas42, Ana M. Castaño‑León61, Marc Maegele81, Marek Majdan20, Alex Manara82, Geoffrey Manley83, Costanza Martino84, Hugues Maréchal48, Julia Mattern85, Catherine McMahon86, Béla Melegh87, David Menon46, Tomas Menovsky42, Davide Mulazzi27, Visakh Muraleedharan57, Lynnette Murray28, Nandesh Nair42, Ancuta Negru88, David Nelson1, Virginia Newcombe46, Daan Nieboer33, Quentin Noirhomme74, József Nyirádi2, Otesile Olubukola75, Matej Oresic89, Fabrizio Ortolano27, Aarno Palotie90, 91, 92, Paul M. Parizel93, Jean‑François Payen94, Natascha Perera12, Vincent Perlbarg16, Paolo Persona95, Wilco Peul96, Anna Piippo-Karjalainen97, Matti Pirinen90, Horia Ples88, Suzanne Polinder33, Inigo Pomposo29, Jussi P. Posti 98, Louis Puybasset99, Andreea Radoi 100, Arminas Ragauskas101, Rahul Raj97, Malinka Rambadagalla102, Ruben Real38, Jonathan Rhodes103, Sylvia Richardson104, Sophie Richter46, Samuli Ripatti90, Saulius Rocka101, Cecilie Roe105, Olav Roise106,107, Jonathan Rosand108, Jeffrey V. Rosenfeld109, Christina Rosenlund110, Guy Rosenthal54, Rolf Rossaint34, Sandra Rossi95, Daniel Rueckert60, Martin Rusnák111, Juan Sahuquillo100, Oliver Sakowitz85, 112, Renan Sanchez‑Porras112, Janos Sandor113, Nadine Schäfer76, Silke Schmidt114, Herbert Schoechl115, Guus Schoonman116, Rico Frederik Schou117, Elisabeth Schwendenwein6, Charlie Sewalt33, Toril Skandsen118, 119 , Peter Smielewski26, Abayomi Sorinola120, Emmanuel Stamatakis46, Simon Stanworth39, Robert Stevens121, William Stewart122, Ewout W. Steyerberg33, 123, Nino Stocchetti124, Nina Sundström125, Anneliese Synnot22, 126, Riikka Takala127, Viktória Tamás120, Tomas Tamosuitis128, MarkSteven Taylor20, Braden Te Ao51, Olli Tenovuo98, Alice Theadom51, Matt Thomas82, Dick Tibboel129, Marjolein Timmers71, Christos Tolias130, Tony Trapani28, CristinaMaria Tudora88, Peter Vajkoczy 131, Shirley Vallance28, Egils Valeinis59, Zoltán Vámos49, Gregory Van der Steen42, Joukje van der Naalt69, Jeroen T.J.M. van Dijck 96, Thomas A. van Essen96, Wim VanHecke132, Caroline van Heugten133, Dominique Van Praag134, Thijs Vande Vyvere132, Audrey Vanhaudenhuyse16, 74, Roel P. J. van Wijk97, Alessia Vargiolu32, Emmanuel Vega79, Kimberley Velt33, Jan Verheyden132, Paul M. Vespa135, Anne Vik117, 136, Rimantas Vilcinis128, Victor Volovici65, Nicole von Steinbüchel38, Daphne Voormolen33, Petar Vulekovic45, KevinK.W. Wang137, Eveline Wiegers33, Guy Williams46, Lindsay Wilson67, Stefan Winzeck46, Stefan Wolf138, Zhihui Yang137, Peter Ylén139, Alexander Younsi85, Frederick A. Zeiler46,140, Veronika Zelinkova20, Agate Ziverte59 , TommasoZoerle27

1 Department of Physiology and Pharmacology, Section of Perioperative Medicine and Intensive Care, Karolinska Institutet, Stockholm, Sweden

2 János Szentágothai Research Centre, University of Pécs, Pécs, Hungary

3 Division of Surgery and Clinical Neuroscience, Department of Physical Medicine and Rehabilitation, Oslo University Hospital and University of Oslo, Oslo, Norway

4 Department of Neurosurgery, University Hospital Northern Norway, Tromso, Norway

5 Department of Physical Medicine and Rehabilitation, University Hospital Northern Norway, Tromso, Norway

6 Trauma Surgery, Medical University Vienna, Vienna, Austria

7 Department of Anesthesiology & Intensive Care, University Hospital Nancy, Nancy, France

8 Raymond Poincare hospital, Assistance Publique – Hopitaux de Paris, Paris, France

9 Department of Anesthesiology & Intensive Care, S Raffaele University Hospital, Milan, Italy

10 Department of Neurosurgery, Radboud University Medical Center, Nijmegen, The Netherlands

11 Department of Neurosurgery, University of Szeged, Szeged, Hungary

12 International Projects Management, ARTTIC, Munchen, Germany

13 Department of Neurology, Neurological Intensive Care Unit, Medical University of Innsbruck, Innsbruck, Austria

14 Department of Neurosurgery & Anesthesia & intensive care medicine, Karolinska University Hospital, Stockholm, Sweden

15 NIHR Surgical Reconstruction and Microbiology Research Centre, Birmingham, UK

16 Anesthesie-Réanimation, Assistance Publique – Hopitaux de Paris, Paris, France

17 Department of Anesthesia & ICU, AOU Città della Salute e della Scienza di Torino - Orthopedic and Trauma Center, Torino, Italy

18 Department of Neurology, Odense University Hospital, Odense, Denmark

19 BehaviourWorks Australia, Monash Sustainability Institute, Monash University, Victoria, Australia

20 Department of Public Health, Faculty of Health Sciences and Social Work, Trnava University, Trnava, Slovakia

21 Quesgen Systems Inc., Burlingame, California, USA

22 Australian & New Zealand Intensive Care Research Centre, Department of Epidemiology and Preventive Medicine, School of Public Health and Preventive Medicine, Monash University, Melbourne, Australia

23 Department of Surgery and Perioperative Science, Umeå University, Umeå, Sweden

24 Department of Neurosurgery, Medical School, University of Pécs, Hungary and Neurotrauma Research Group, János Szentágothai Research Centre, University of Pécs, Hungary

25 Department of Medical Psychology, Universitätsklinikum Hamburg-Eppendorf, Hamburg, Germany

26 Brain Physics Lab, Division of Neurosurgery, Dept of Clinical Neurosciences, University of Cambridge, Addenbrooke’s Hospital, Cambridge, UK

27 Neuro ICU, Fondazione IRCCS Cà Granda Ospedale Maggiore Policlinico, Milan, Italy

28 ANZIC Research Centre, Monash University, Department of Epidemiology and Preventive Medicine, Melbourne, Victoria, Australia

29 Department of Neurosurgery, Hospital of Cruces, Bilbao, Spain

30 NeuroIntensive Care, Niguarda Hospital, Milan, Italy

31 School of Medicine and Surgery, Università Milano Bicocca, Milano, Italy

32 NeuroIntensive Care, ASST di Monza, Monza, Italy

33 Department of Public Health, Erasmus Medical Center-University Medical Center, Rotterdam, The Netherlands

34 Department of Anaesthesiology, University Hospital of Aachen, Aachen, Germany

35 Department of Anesthesia & Neurointensive Care, Cambridge University Hospital NHS Foundation Trust, Cambridge, UK

36 School of Public Health & PM, Monash University and The Alfred Hospital, Melbourne, Victoria, Australia

37 Radiology/MRI department, MRC Cognition and Brain Sciences Unit, Cambridge, UK

38 Institute of Medical Psychology and Medical Sociology, Universitätsmedizin Göttingen, Göttingen, Germany

39 Oxford University Hospitals NHS Trust, Oxford, UK

40 Intensive Care Unit, CHU Poitiers, Potiers, France

41 Movement Science Group, Faculty of Health and Life Sciences, Oxford Brookes University, Oxford, UK

42 Department of Neurosurgery, Antwerp University Hospital and University of Antwerp, Edegem, Belgium

43 Department of Anesthesia & Intensive Care, Maggiore Della Carità Hospital, Novara, Italy

44 Department of Neurosurgery, University Hospitals Leuven, Leuven, Belgium

45 Department of Neurosurgery, Clinical centre of Vojvodina, Faculty of Medicine, University of Novi Sad, Novi Sad, Serbia

46 Division of Anaesthesia, University of Cambridge, Addenbrooke’s Hospital, Cambridge, UK

47 Center for Stroke Research Berlin, Charité – Universitätsmedizin Berlin, corporate member of Freie Universität Berlin, Humboldt-Universität zu Berlin, and Berlin Institute of Health, Berlin, Germany

48 Intensive Care Unit, CHR Citadelle, Liège, Belgium

49 Department of Anaesthesiology and Intensive Therapy, University of Pécs, Pécs, Hungary

50 Departments of Neurology, Clinical Neurophysiology and Neuroanesthesiology, Region Hovedstaden Rigshospitalet, Copenhagen, Denmark

51 National Institute for Stroke and Applied Neurosciences, Faculty of Health and Environmental Studies, Auckland University of Technology, Auckland, New Zealand

52 Department of Neurology, Erasmus MC, Rotterdam, the Netherlands

53 Department of Anesthesiology and Intensive care, University Hospital Northern Norway, Tromso, Norway

54 Department of Neurosurgery, Hadassah-hebrew University Medical center, Jerusalem, Israel

55 Fundación Instituto Valenciano de Neurorrehabilitación (FIVAN), Valencia, Spain

56 Department of Neurosurgery, Shanghai Renji hospital, Shanghai Jiaotong University/school of medicine, Shanghai, China

57 Karolinska Institutet, INCF International Neuroinformatics Coordinating Facility, Stockholm, Sweden

58 Emergency Department, CHU, Liège, Belgium

59 Neurosurgery clinic, Pauls Stradins Clinical University Hospital, Riga, Latvia

60 Department of Computing, Imperial College London, London, UK

61 Department of Neurosurgery, Hospital Universitario 12 de Octubre, Madrid, Spain

62 Department of Anesthesia, Critical Care and Pain Medicine, Medical University of Vienna, Austria

63 College of Health and Medicine, Australian National University, Canberra, Australia

64 Department of Neurosurgery, Neurosciences Centre & JPN Apex trauma centre, All India Institute of Medical Sciences, New Delhi-110029, India

65 Department of Neurosurgery, Erasmus MC, Rotterdam, the Netherlands

66 Department of Neurosurgery, Oslo University Hospital, Oslo, Norway

67 Division of Psychology, University of Stirling, Stirling, UK

68 Division of Neurosurgery, Department of Clinical Neurosciences, Addenbrooke’s Hospital & University of Cambridge, Cambridge, UK

69 Department of Neurology, University of Groningen, University Medical Center Groningen, Groningen, Netherlands

70 Neurointensive Care , Sheffield Teaching Hospitals NHS Foundation Trust, Sheffield, UK

71 Department of Intensive Care and Department of Ethics and Philosophy of Medicine, Erasmus Medical Center, Rotterdam, The Netherlands

72 Department of Clinical Neuroscience, Neurosurgery, Umeå University, Umeå, Sweden

73 Hungarian Brain Research Program - Grant No. KTIA_13_NAP-A-II/8, University of Pécs, Pécs, Hungary

74 Cyclotron Research Center , University of Liège, Liège, Belgium

75 Emergency Medicine Research in Sheffield, Health Services Research Section, School of Health and Related Research (ScHARR), University of Sheffield, Sheffield, UK

76 Institute of Research in Operative Medicine (IFOM), Witten/Herdecke University, Cologne, Germany

77 VP Global Project Management CNS, ICON, Paris, France

78 Department of Anesthesiology-Intensive Care, Lille University Hospital, Lille, France

79 Department of Neurosurgery, Rambam Medical Center, Haifa, Israel

80 Department of Anesthesiology & Intensive Care, University Hospitals Southhampton NHS Trust, Southhampton, UK

81 Cologne-Merheim Medical Center (CMMC), Department of Traumatology, Orthopedic Surgery and Sportmedicine, Witten/Herdecke University, Cologne, Germany

82 Intensive Care Unit, Southmead Hospital, Bristol, Bristol, UK

83 Department of Neurological Surgery, University of California, San Francisco, California, USA

84 Department of Anesthesia & Intensive Care,M. Bufalini Hospital, Cesena, Italy

85 Department of Neurosurgery, University Hospital Heidelberg, Heidelberg, Germany

86 Department of Neurosurgery, The Walton centre NHS Foundation Trust, Liverpool, UK

87 Department of Medical Genetics, University of Pécs, Pécs, Hungary

88 Department of Neurosurgery, Emergency County Hospital Timisoara , Timisoara, Romania

89 School of Medical Sciences, Örebro University, Örebro, Sweden

90 Institute for Molecular Medicine Finland, University of Helsinki, Helsinki, Finland

91 Analytic and Translational Genetics Unit, Department of Medicine; Psychiatric & Neurodevelopmental Genetics Unit, Department of Psychiatry; Department of Neurology, Massachusetts General Hospital, Boston, MA, USA

92 Program in Medical and Population Genetics; The Stanley Center for Psychiatric Research, The Broad Institute of MIT and Harvard, Cambridge, MA, USA

93 Department of Radiology, Antwerp University Hospital and University of Antwerp, Edegem, Belgium

94 Department of Anesthesiology & Intensive Care, University Hospital of Grenoble, Grenoble, France

95 Department of Anesthesia & Intensive Care, Azienda Ospedaliera Università di Padova, Padova, Italy

96 Dept. of Neurosurgery, Leiden University Medical Center, Leiden, The Netherlands and Dept. of Neurosurgery, Medical Center Haaglanden, The Hague, The Netherlands

97 Department of Neurosurgery, Helsinki University Central Hospital

98 Division of Clinical Neurosciences, Department of Neurosurgery and Turku Brain Injury Centre, Turku University Hospital and University of Turku, Turku, Finland

99 Department of Anesthesiology and Critical Care, Pitié -Salpêtrière Teaching Hospital, Assistance Publique, Hôpitaux de Paris and University Pierre et Marie Curie, Paris, France

100 Neurotraumatology and Neurosurgery Research Unit (UNINN), Vall d'Hebron Research Institute, Barcelona, Spain

101 Department of Neurosurgery, Kaunas University of technology and Vilnius University, Vilnius, Lithuania

102 Department of Neurosurgery, Rezekne Hospital, Latvia

103 Department of Anaesthesia, Critical Care & Pain Medicine NHS Lothian & University of Edinburg, Edinburgh, UK

104 Director, MRC Biostatistics Unit, Cambridge Institute of Public Health, Cambridge, UK

105 Department of Physical Medicine and Rehabilitation, Oslo University Hospital/University of Oslo, Oslo, Norway

106 Division of Orthopedics, Oslo University Hospital, Oslo, Norway

107 Institue of Clinical Medicine, Faculty of Medicine, University of Oslo, Oslo, Norway

108 Broad Institute, Cambridge MA Harvard Medical School, Boston MA, Massachusetts General Hospital, Boston MA, USA

109 National Trauma Research Institute, The Alfred Hospital, Monash University, Melbourne, Victoria, Australia

110 Department of Neurosurgery, Odense University Hospital, Odense, Denmark

111 International Neurotrauma Research Organisation, Vienna, Austria

112 Klinik für Neurochirurgie, Klinikum Ludwigsburg, Ludwigsburg, Germany

113 Division of Biostatistics and Epidemiology, Department of Preventive Medicine, University of Debrecen, Debrecen, Hungary

114 Department Health and Prevention, University Greifswald, Greifswald, Germany

115 Department of Anaesthesiology and Intensive Care, AUVA Trauma Hospital, Salzburg, Austria

116 Department of Neurology, Elisabeth-TweeSteden Ziekenhuis, Tilburg, the Netherlands

117 Department of Neuroanesthesia and Neurointensive Care, Odense University Hospital, Odense, Denmark

118 Department of Neuromedicine and Movement Science, Norwegian University of Science and Technology, NTNU, Trondheim, Norway

119 Department of Physical Medicine and Rehabilitation, St.Olavs Hospital, Trondheim University Hospital, Trondheim, Norway

120 Department of Neurosurgery, University of Pécs, Pécs, Hungary

121 Division of Neuroscience Critical Care, John Hopkins University School of Medicine, Baltimore, USA

122 Department of Neuropathology, Queen Elizabeth University Hospital and University of Glasgow, Glasgow, UK

123 Dept. of Department of Biomedical Data Sciences, Leiden University Medical Center, Leiden, The Netherlands

124 Department of Pathophysiology and Transplantation, Milan University, and Neuroscience ICU, Fondazione IRCCS Cà Granda Ospedale Maggiore Policlinico, Milano, Italy

125 Department of Radiation Sciences, Biomedical Engineering, Umeå University, Umeå, Sweden

126 Cochrane Consumers and Communication Review Group, Centre for Health Communication and Participation, School of Psychology and Public Health, La Trobe University, Melbourne, Australia

127 Perioperative Services, Intensive Care Medicine and Pain Management, Turku University Hospital and University of Turku, Turku, Finland

128 Department of Neurosurgery, Kaunas University of Health Sciences, Kaunas, Lithuania

129 Intensive Care and Department of Pediatric Surgery, Erasmus Medical Center, Sophia Children’s Hospital, Rotterdam, The Netherlands

130 Department of Neurosurgery, Kings college London, London, UK

131 Neurologie, Neurochirurgie und Psychiatrie, Charité – Universitätsmedizin Berlin, Berlin, Germany

132 icoMetrix NV, Leuven, Belgium

133 Movement Science Group, Faculty of Health and Life Sciences, Oxford Brookes University, Oxford, UK

134 Psychology Department, Antwerp University Hospital, Edegem, Belgium

135 Director of Neurocritical Care, University of California, Los Angeles, USA

136 Department of Neurosurgery, St.Olavs Hospital, Trondheim University Hospital, Trondheim, Norway

137 Department of Emergency Medicine, University of Florida, Gainesville, Florida, USA

138 Department of Neurosurgery, Charité – Universitätsmedizin Berlin, corporate member of Freie Universität Berlin, Humboldt-Universität zu Berlin, and Berlin Institute of Health, Berlin, Germany

139 VTT Technical Research Centre, Tampere, Finland

140 Section of Neurosurgery, Department of Surgery, Rady Faculty of Health Sciences, University of Manitoba, Winnipeg, MB, Canada

# References

1. Schneier AJ, Shields BJ, Hostetler SG, Xiang H, Smith GA. Incidence of Pediatric Traumatic Brain Injury and Associated Hospital Resource Utilization in the United States. *Pediatrics* (2006) **118**:483–492. doi:10.1542/peds.2005-2588

2. Araki T, Yokota H, Morita A. Pediatric Traumatic Brain Injury: Characteristic Features, Diagnosis, and Management. *Neurol Med Chir (Tokyo)* (2017) **57**:82–93. doi:10.2176/nmc.ra.2016-0191

3. Dewan MC, Mummareddy N, Wellons JC, Bonfield CM. Epidemiology of Global Pediatric Traumatic Brain Injury: Qualitative Review. *World Neurosurg* (2016) **91**:497-509.e1. doi:10.1016/j.wneu.2016.03.045

4. Maas AIR, Menon DK, Steyerberg EW, Citerio G, Lecky F, Manley GT, Hill S, Legrand V, Sorgner A, CENTER-TBI Participants and Investigators. Collaborative European NeuroTrauma Effectiveness Research in Traumatic Brain Injury (CENTER-TBI). *Neurosurgery* (2015) **76**:67–80. doi:10.1227/NEU.0000000000000575

5. R Core Team. R: A Language and Environment for Statistical Computing. (2018) Available at: https://www.r-project.org/

6. The Lancet T. The burden of traumatic brain injury in children. *Lancet (London, England)* (2018) **391**:813. doi:10.1016/S0140-6736(18)30547-6

7. Amaranath JE, Ramanan M, Reagh J, Saekang E, Prasad N, Chaseling R, Soundappan S. Epidemiology of traumatic head injury from a major paediatric trauma centre in New South Wales, Australia. *ANZ J Surg* (2014) **84**:424–428. doi:10.1111/ans.12445

8. Bowman SM, Bird TM, Aitken ME, Tilford JM. Trends in Hospitalizations Associated With Pediatric Traumatic Brain Injuries. *Pediatrics* (2008) **122**:988–993. doi:10.1542/peds.2007-3511

9. Schrieff LE, Thomas KGF, Dollman AK, Rohlwink UK, Figaji AA. Demographic profile of severe traumatic brain injury admissions to Red Cross War Memorial Children’s Hospital, 2006 - 2011. *South African Med J* (2013) **103**:616. doi:10.7196/samj.7137

10. Parslow RC, Morris KP, Tasker RC, Forsyth RJ, Hawley CA, UK Paediatric Traumatic Brain Injury Study Steering Group, Paediatric Intensive Care Society Study Group. Epidemiology of traumatic brain injury in children receiving intensive care in the UK. *Arch Dis Child* (2005) **90**:1182–1187. doi:10.1136/ADC.2005.072405

11. Sarioglu FC, Sahin H, Pekcevik Y, Sarioglu O, Oztekin O. Pediatric head trauma: an extensive review on imaging requisites and unique imaging findings. *Eur J Trauma Emerg Surg* (2018) **44**:351–368. doi:10.1007/s00068-017-0838-y

12. Luerssen TG, Klauber MR, Marshall LF. Outcome from head injury related to patient’ age. *J Neurosurg* (1988) **68**:409–416. doi:10.3171/jns.1988.68.3.0409

13. Bahloul M, Chabchoub I, Dammak H, Ksibi H, Rekik N, Bouaziz M, Chaari A, Medhyoub F, Kallel H, Haddar S, et al. Outcome analysis and outcome predictors of traumatic head injury in childhood: Analysis of 454 observations. *J Emerg Trauma Shock* (2011) **4**:198. doi:10.4103/0974-2700.82206

14. Coates BM, Vavilala MS, Mack CD, Muangman S, Suz P, Sharar SR, Bulger E, Lam AM. Influence of definition and location of hypotension on outcome following severe pediatric traumatic brain injury. *Crit Care Med* (2005) **33**:2645–50. doi:10.1097/01.ccm.0000186417.19199.9b

15. Samant UB, Mack CD, Koepsell T, Rivara FP, Vavilala MS. Time of Hypotension and Discharge Outcome in Children with Severe Traumatic Brain Injury. *J Neurotrauma* (2008) **25**:495–502. doi:10.1089/neu.2007.0491

16. Greene NH, Kernic MA, Vavilala MS, Rivara FP. Variation in Pediatric Traumatic Brain Injury Outcomes in the United States. *Arch Phys Med Rehabil* (2014) **95**:1148–1155. doi:10.1016/j.apmr.2014.02.020

17. Robertson BD, McConnel CE, Green S. Charges associated with pediatric head injuries: A five-year retrospective review of 41 pediatric hospitals in the US. *J Inj Violence Res* (2013) **5**:50–60. doi:10.5249/jivr.v5i1.205

18. Wani AA, Sarmast AH, Ahangar M, Malik NK, Chhibber SS, Arif SH, Ramzan AU, Dar BA, Ali Z. Pediatric Head Injury: A Study of 403 Cases in a Tertiary Care Hospital in a Developing Country. *J Pediatr Neurosci* (2017) **12**:332–337. doi:10.4103/jpn.JPN_80_17

19. Slovis JC, Gupta N, Li NY, Kernie SG, Miles DK. Assessment of Recovery Following Pediatric Traumatic Brain Injury. *Pediatr Crit Care Med* (2018) **19**:353–360. doi:10.1097/PCC.0000000000001490
